# Supplementary material for: Expression profile and prognostic values of GATA family members in kidney renal clear cell carcinoma
Source: Aging (Albany NY). 2023 Mar 23;15(6):2170–88. doi: 10.18632/aging.204607 (PMC10085589; doi:10.18632/aging.204607)
Supplement: Supplementary Table 1 [file aging-15-204607-s001.xlsx]

## Sheet: Sheet1
Supplementary Table 1. The co-expression genes of the GATA family members.
Gene	Cytoband	Altered group	Unaltered group	Altered group	Unaltered group	Log Ratio	p-Value	q-Value	Higher expression in
KIF19	17q25.1	2.3	3.44	1.23	1.21	-1.14	4.52e-07	0.0008974	Unaltered group
LY6E-DT	8q24.3	2.56	3.92	1.59	1.72	-1.36	2.181e-06	0.002914	Unaltered group
SLC22A12	11q13.1	4.95	7.68	3.25	3.33	-2.73	2.954e-06	0.003063	Unaltered group
RGS9	17q24.1	4.48	6.06	1.88	1.81	-1.58	2.994e-06	0.003063	Unaltered group
NAPSA	19q13.33	5.54	7.56	2.4	2.56	-2.01	3.056e-06	0.003063	Unaltered group
ARSF	Xp22.33	2.99	4.64	1.98	2.33	-1.65	4.188e-06	0.003676	Unaltered group
LINC00671	17q21.31	3.93	6.24	2.83	3.04	-2.32	4.885e-06	0.003804	Unaltered group
DHDH	19q13.33	3.63	5.32	2.14	2.09	-1.69	7.988e-06	0.005336	Unaltered group
USHBP1	19p13.11	6.29	7.33	1.33	1.2	-1.05	8.457e-06	0.005467	Unaltered group
PLCH2	1p36.32	5.24	6.94	2.19	1.86	-1.69	1.112e-05	0.006534	Unaltered group
FRMD1	6q27	1.77	3.32	2	2.29	-1.56	1.267e-05	0.006863	Unaltered group
C2CD4C	19p13.3	4.16	5.19	1.38	1.29	-1.03	2.209e-05	0.008515	Unaltered group
SLC4A3	2q35	6.02	4.46	2.1	2.34	1.57	2.432e-05	0.009098	Altered group
ANK1	8p11.21	5.33	6.94	2.21	2.03	-1.61	3.041e-05	0.009674	Unaltered group
CCDC158	4q21.1	2.06	3.08	1.38	1.72	-1.01	3.575e-05	0.0104	Unaltered group
NOL4	18q12.1	1.23	2.34	1.49	2.24	-1.11	3.627e-05	0.0104	Unaltered group
KCNK5	6p21.2	8.3	9.39	1.54	0.98	-1.09	3.77e-05	0.0105	Unaltered group
SLC5A8	12q23.1-q23.2	4.63	7.4	3.91	3.49	-2.77	4.438e-05	0.0111	Unaltered group
SCN4A	17q23.3	5.26	6.46	1.69	1.73	-1.2	4.589e-05	0.0111	Unaltered group
CABP1	12q24.31	5.36	6.81	2.07	1.92	-1.46	4.913e-05	0.0115	Unaltered group
CIB4	2p23.3	1.34	2.52	1.68	1.69	-1.18	5.11e-05	0.0116	Unaltered group
ALOX12B	17p13.1	2.14	3.32	1.67	1.56	-1.17	5.203e-05	0.0117	Unaltered group
EDN1	6p24.1	8.62	10.07	2.1	1.44	-1.44	5.986e-05	0.0125	Unaltered group
MOCOS	18q12.2	6.38	5.17	1.71	2.25	1.22	6.041e-05	0.0125	Altered group
REN	1q32.1	5.64	7.74	3	3.62	-2.11	6.656e-05	0.0128	Unaltered group
GYPA	4q31.21	1.19	2.38	1.73	1.8	-1.2	7.293e-05	0.0132	Unaltered group
TRIM15	6p22.1	5.28	7.19	2.82	1.96	-1.91	7.945e-05	0.0135	Unaltered group
FCRL3	1q23.1	3.32	4.54	1.82	1.78	-1.22	9.868e-05	0.0151	Unaltered group
COL19A1	6q13	2.12	3.12	1.47	1.82	-1	0.0001003	0.0151	Unaltered group
LHFPL3-AS2	7q22.3	3.91	5.58	2.51	2.1	-1.67	0.0001021	0.0151	Unaltered group
AVPR1B	1q32.1	3.14	4.74	2.42	1.8	-1.6	0.0001027	0.0151	Unaltered group
RIPOR3	20q13.13	6.67	7.95	1.9	1.96	-1.28	0.000105	0.0152	Unaltered group
GRIK3	1p34.3	7.16	8.72	2.37	1.85	-1.57	0.0001072	0.0152	Unaltered group
SLC6A3	5p15.33	7.37	10.37	4.54	3.21	-3	0.000108	0.0152	Unaltered group
ASRGL1	11q12.3	8.29	9.32	1.56	1.25	-1.03	0.0001103	0.0153	Unaltered group
IQSEC3	12p13.33	4.64	6.24	2.4	2.17	-1.59	0.0001131	0.0154	Unaltered group
CES3	16q22.1	7.69	9.4	2.58	2.07	-1.7	0.0001154	0.0155	Unaltered group
ASPG	14q32.33	3.95	6.2	3.4	3.1	-2.25	0.0001176	0.0155	Unaltered group
DRAIC	15q23	5.29	6.65	2.07	1.86	-1.37	0.0001215	0.0155	Unaltered group
KLHL32	6q16.1	4.78	5.85	1.64	1.28	-1.07	0.0001226	0.0155	Unaltered group
MSX2	5q35.2	4.18	3.04	1.73	1.61	1.14	0.0001285	0.0155	Altered group
UST	6q25.1	6.82	5.73	1.65	1.55	1.09	0.0001317	0.0155	Altered group
ADSS1	14q32.33	8.69	9.85	1.78	1.69	-1.17	0.0001367	0.0155	Unaltered group
PSORS1C3	6p21.33	3.2	4.4	1.83	1.66	-1.2	0.0001409	0.0155	Unaltered group
WNT6	2q35	2.29	3.33	1.59	1.53	-1.04	0.0001481	0.0156	Unaltered group
PSAT1	9q21.2	8.41	7	2.16	2.14	1.41	0.0001494	0.0156	Altered group
TMEM174	5q13.2	4.55	6.54	3.05	3.04	-1.99	0.0001531	0.0156	Unaltered group
TLL1	4q32.3	6.8	8.06	1.98	1.46	-1.26	0.0001693	0.0162	Unaltered group
SLC25A48	5q31.1	2.69	3.96	1.97	2.02	-1.27	0.0001878	0.0169	Unaltered group
SLC22A24	11q12.3	1.64	2.76	1.73	1.97	-1.12	0.0001934	0.0172	Unaltered group
CDH9	5p14.1	1.05	2.08	1.56	2.17	-1.02	0.0002032	0.0174	Unaltered group
CYP4A11	1p33	5.85	8.49	4.18	3.58	-2.64	0.0002103	0.0175	Unaltered group
FGFBP2	4p15.32	4.41	5.44	1.64	1.32	-1.03	0.00022	0.0178	Unaltered group
SLC6A18	5p15.33	2.64	4.58	3.05	3.46	-1.95	0.0002245	0.0178	Unaltered group
EVPLL	17p11.2	2.24	3.36	1.78	1.57	-1.12	0.0002272	0.0178	Unaltered group
DACT2	6q27	2.46	3.8	2.08	2.59	-1.34	0.0002276	0.0178	Unaltered group
AMN	14q32.32	7.39	9.22	2.97	2.03	-1.84	0.0002475	0.0178	Unaltered group
EPB41L4B	9q31.3	4.87	3.26	2.62	1.84	1.61	0.0002714	0.0183	Altered group
SCGN	6p22.2	5.63	7.89	3.66	3	-2.26	0.0002743	0.0184	Unaltered group
TEKT2	1p34.3	3.04	4.22	1.9	1.69	-1.18	0.0002777	0.0185	Unaltered group
ESPN	1p36.31	5.92	7.56	2.7	1.83	-1.64	0.0002977	0.0191	Unaltered group
CDH4	20q13.33	4.21	6.05	2.98	2.93	-1.84	0.0003041	0.0192	Unaltered group
HOXA4	7p15.2	7.57	8.63	1.76	0.92	-1.06	0.0003087	0.0194	Unaltered group
EXOC3L4	14q32.32	5.72	7.31	2.62	1.52	-1.59	0.0003101	0.0194	Unaltered group
SLC6A13	12p13.33	8.71	10.85	3.52	2.42	-2.14	0.0003192	0.0195	Unaltered group
SYT9	11p15.4	4.58	6.34	2.91	2.42	-1.76	0.0003407	0.0198	Unaltered group
INSYN2B	5q35.1	3.56	4.94	2.26	2.18	-1.37	0.0003613	0.0203	Unaltered group
GLTPD2	17p13.2	2.63	4.08	2.4	2.08	-1.45	0.0003656	0.0204	Unaltered group
LYG1	2q11.2	6.26	7.83	2.62	1.82	-1.57	0.0003663	0.0204	Unaltered group
DAZ1	Yq11.223	1.22	2.51	2.08	2.74	-1.29	0.0003796	0.0206	Unaltered group
ADORA2A-AS1	22q11.23	5.47	6.82	2.27	1.56	-1.35	0.000406	0.0213	Unaltered group
CCBE1	18q21.32	4.01	2.38	2.74	2.11	1.63	0.0004149	0.0214	Altered group
HAO2	1p12	5.53	7.46	3.27	2.68	-1.93	0.0004569	0.0224	Unaltered group
MGAM	7q34	7.39	9.21	3.1	2.31	-1.82	0.0004648	0.0226	Unaltered group
CLCNKA	1p36.13	5.44	3.42	3.47	2.38	2.02	0.0005229	0.0239	Altered group
COL25A1	4q25	4.26	5.44	2.02	1.85	-1.18	0.0005385	0.0243	Unaltered group
NAT8B	2p13.1	4.47	5.87	2.41	2.12	-1.41	0.0005444	0.0243	Unaltered group
GPIHBP1	8q24.3	6.33	7.34	1.74	1.43	-1.01	0.0005809	0.0251	Unaltered group
HES4	1p36.33	5.61	6.68	1.86	1.25	-1.07	0.0005954	0.0253	Unaltered group
LINC01550	14q32.2	5.39	6.62	2.14	1.21	-1.23	0.0005994	0.0254	Unaltered group
TM4SF5	17p13.2	4.88	6.63	3.03	2.26	-1.74	0.0006036	0.0256	Unaltered group
F2RL3	19p13.11	7.66	8.72	1.83	1.59	-1.05	0.0006162	0.0259	Unaltered group
LINC00173	12q24.22	3.76	4.97	2.1	1.74	-1.21	0.000636	0.0262	Unaltered group
TRIM10	6p22.1	4.53	6.01	2.59	1.8	-1.48	0.000644	0.0263	Unaltered group
MLXIPL	7q11.23	6.98	8.42	2.53	1.76	-1.44	0.0006698	0.027	Unaltered group
SLC5A1	22q12.3	6.65	8.49	3.2	3.06	-1.84	0.0006802	0.027	Unaltered group
ASIC1	12q13.12	4.83	3.77	1.84	1.65	1.05	0.0006879	0.0271	Altered group
SLC23A3	2q35	6.57	8.37	3.17	2.42	-1.8	0.0006902	0.0271	Unaltered group
SLC17A4	6p22.2	6.75	8.68	3.39	2.75	-1.93	0.0006903	0.0271	Unaltered group
FBXL16	16p13.3	8.21	9.59	2.45	1.61	-1.38	0.0007094	0.0274	Unaltered group
C6ORF223	6p21.1	7.97	9.29	2.32	1.88	-1.32	0.0007108	0.0274	Unaltered group
AQP4	18q11.2	4.03	5.47	2.55	2.01	-1.45	0.0007231	0.0277	Unaltered group
NOG	17q22	2.7	4	2.26	2.32	-1.29	0.0007389	0.028	Unaltered group
C14ORF180	14q32.33	2.54	3.87	2.31	2.67	-1.32	0.0007966	0.0286	Unaltered group
ALKAL2	2p25.3	5.71	7.34	2.91	2.25	-1.62	0.0008648	0.0294	Unaltered group
CYP21A2	6p21.33	5.16	6.51	2.45	1.63	-1.36	0.0008727	0.0294	Unaltered group
BDNF	11p14.1	4.76	5.87	1.99	1.75	-1.11	0.0009008	0.0298	Unaltered group
MAPT	17q21.31	8.95	10.15	2.17	1.66	-1.2	0.0009014	0.0298	Unaltered group
SLC22A11	11q13.1	7.72	9.72	3.6	2.45	-1.99	0.0009035	0.0298	Unaltered group
TAL2	9q31.2	3.16	4.16	1.8	1.58	-1	0.000916	0.03	Unaltered group
OR2T10	1q44	1.87	2.96	1.95	2.02	-1.09	0.0009169	0.03	Unaltered group
FOSB	19q13.32	8.67	10.1	2.57	2.46	-1.44	0.0009367	0.0303	Unaltered group
SLC6A19	5p15.33	4.87	7.01	3.84	3.81	-2.14	0.000974	0.0306	Unaltered group
SCGB1D2	11q12.3	2.39	3.55	2.09	1.91	-1.16	0.0009863	0.0309	Unaltered group
PVALB	22q12.3	4.42	1.94	4.55	2.73	2.48	0.001	0.0313	Altered group
COL23A1	5q35.3	9.41	11.41	3.69	1.92	-2	0.001044	0.0319	Unaltered group
KISS1R	19p13.3	4.5	6.1	2.89	2.68	-1.59	0.001044	0.0319	Unaltered group
VIL1	2q35	5	6.84	3.35	2.98	-1.85	0.001055	0.032	Unaltered group
ADRA2C	4p16.3	5.49	6.49	1.83	1.45	-1	0.001067	0.0321	Unaltered group
LINC00887	3q29	6.9	8.74	3.4	1.93	-1.84	0.001083	0.0321	Unaltered group
GIPC2	1p31.1	8.06	9.15	1.99	1.55	-1.09	0.00109	0.0321	Unaltered group
CDK18	1q32.1	11.48	12.54	1.95	1.08	-1.06	0.00109	0.0321	Unaltered group
MASP1	3q27.3	8.06	9.42	2.5	1.78	-1.36	0.001094	0.0321	Unaltered group
IL1RL1	2q12.1	4.6	5.78	2.14	2.12	-1.18	0.001103	0.0322	Unaltered group
SUGCT	7p14.1	6.07	7.1	1.91	1.22	-1.03	0.001152	0.0329	Unaltered group
KCNF1	2p25.1	3.88	4.88	1.85	1.71	-1.01	0.001157	0.033	Unaltered group
SLC39A5	12q13.3	7.01	8.91	3.52	2.47	-1.9	0.00116	0.0331	Unaltered group
MIOX	22q13.33	7.22	9.16	3.61	2.63	-1.94	0.001196	0.0335	Unaltered group
GAD1	2q31.1	5.39	3.96	2.6	2.68	1.42	0.001205	0.0335	Altered group
SEMA5B	3q21.1	9.93	11.42	2.79	1.45	-1.49	0.001228	0.0339	Unaltered group
ASXL3	18q12.1	4.04	5.16	2.06	1.77	-1.11	0.001236	0.034	Unaltered group
ONECUT2	18q21.31	4.04	2.83	2.24	1.99	1.21	0.001273	0.0348	Altered group
HOXA13	7p15.2	4.05	2.88	2.2	1.72	1.17	0.001337	0.0357	Altered group
MAB21L3	1p13.1	4.98	3.6	2.57	2.07	1.37	0.001357	0.0359	Altered group
POU5F1	6p21.33	6.72	7.83	2.08	1.59	-1.11	0.001416	0.0368	Unaltered group
ABO	9q34.2	4.57	5.85	2.4	2.1	-1.28	0.001443	0.0372	Unaltered group
MOGAT3	7q22.1	3.19	4.52	2.49	2.3	-1.33	0.00149	0.038	Unaltered group
FAXC	6q16.2	3.92	2.63	2.44	2.05	1.29	0.001512	0.0382	Altered group
DDC	7p12.2-p12.1	7.32	9.32	3.84	2.54	-2.01	0.001556	0.0388	Unaltered group
CDHR5	11p15.5	8.85	10.95	4.03	2.44	-2.1	0.001579	0.039	Unaltered group
MSLN	16p13.3	3.15	4.7	2.87	3.52	-1.55	0.001598	0.0392	Unaltered group
NXNL2	9q22.1	4.5	5.54	2	1.35	-1.04	0.001631	0.0394	Unaltered group
G6PC1	17q21.31	3.64	5.34	3.22	2.81	-1.69	0.001645	0.0396	Unaltered group
SLC5A10	17p11.2	7.47	9.27	3.44	2.47	-1.79	0.001648	0.0396	Unaltered group
BMPR1B	4q22.3	5.49	3.76	3.32	2.45	1.73	0.001649	0.0396	Altered group
GLIS1	1p32.3	6.13	7.43	2.51	1.67	-1.3	0.001694	0.0399	Unaltered group
AOC1	7q36.1	9.33	11.26	3.69	2.88	-1.93	0.00171	0.04	Unaltered group
NRXN2	11q13.1	7.63	8.93	2.51	1.58	-1.3	0.001729	0.0402	Unaltered group
HILPDA	7q32.1	10.64	11.73	2.12	1.38	-1.09	0.001763	0.0406	Unaltered group
CCNO	5q11.2	3.78	2.62	2.2	1.98	1.15	0.001773	0.0406	Altered group
HOXB9	17q21.32	6.69	5.48	2.33	1.88	1.21	0.001842	0.0413	Altered group
ACY3	11q13.2	7.34	8.86	2.96	1.76	-1.52	0.00185	0.0414	Unaltered group
HCN2	19p13.3	4.18	2.65	2.98	1.64	1.52	0.001877	0.0418	Altered group
LGALS2	22q13.1	7.78	9.39	3.15	2	-1.61	0.001901	0.0421	Unaltered group
DPEP1	16q24.3	4.49	5.81	2.54	2.42	-1.32	0.001955	0.0426	Unaltered group
SLC27A2	15q21.2	7.95	9.14	2.31	1.95	-1.19	0.001958	0.0426	Unaltered group
CHST9	18q11.2	6.19	7.81	3.15	2.34	-1.62	0.001965	0.0426	Unaltered group
IGF2BP2	3q27.2	6.23	5.17	2.03	2.02	1.05	0.002003	0.0429	Altered group
SLC16A7	12q14.1	6.62	5.48	2.26	1.43	1.14	0.002248	0.0451	Altered group
KCNK3	2p23.3	8.31	9.93	3.23	1.93	-1.62	0.002309	0.0459	Unaltered group
PDZRN3	3p13	6.22	7.26	2.08	1.46	-1.05	0.002318	0.0459	Unaltered group
HSF4	16q22.1	8.32	9.32	1.97	1.75	-1	0.002326	0.0459	Unaltered group
DOC2A	16p11.2	6.36	7.87	3	2.24	-1.51	0.002346	0.0462	Unaltered group
MYO7B	2q14.3	6.43	7.58	2.3	1.75	-1.15	0.002461	0.0476	Unaltered group
ATP13A4	3q29	3.13	4.16	2.02	2.15	-1.03	0.002595	0.0487	Unaltered group
CLTRN	Xp22.2	9.46	10.85	2.8	2.09	-1.39	0.002616	0.0488	Unaltered group
C4A	6p21.33	13.51	14.89	2.81	1.28	-1.38	0.002633	0.0489	Unaltered group
ALPK2	18q21.31-q21.32	9.16	10.77	3.27	1.74	-1.6	0.002674	0.0491	Unaltered group
MYOM3	1p36.11	8.17	9.51	2.72	1.62	-1.34	0.00269	0.0491	Unaltered group
PRODH	22q11.21	7.84	9.37	3.12	1.98	-1.54	0.002733	0.0493	Unaltered group
TRPM3	9q21.12-q21.13	4.93	6.19	2.54	2.17	-1.26	0.002746	0.0495	Unaltered group
TRIM55	8q13.1	6.99	8.34	2.75	1.65	-1.35	0.002773	0.0496	Unaltered group
SLITRK5	13q31.2	3.83	5.11	2.56	2.48	-1.28	0.002807	0.0497	Unaltered group
FMO2	1q24.3	7.73	9.19	2.97	1.98	-1.46	0.002814	0.0498	Unaltered group
EDN2	1p34.2	5.4	6.73	2.69	2.21	-1.33	0.002829	0.0499	Unaltered group
FHL5	6q16.1	6.76	7.79	2.11	1.42	-1.04	0.002842	0.0499	Unaltered group
SLC22A6	11q12.3	4.44	6.4	3.94	3.67	-1.96	0.002851	0.0499	Unaltered group
TMEM252	9q21.11	5.17	6.55	2.79	2.22	-1.38	0.002895	0.0502	Unaltered group
SLC5A12	11p14.2	7.54	9.39	3.76	3.04	-1.85	0.002922	0.0504	Unaltered group
APOM	6p21.33	7.43	8.45	2.08	1.67	-1.02	0.002935	0.0505	Unaltered group
MYH11	16p13.11	10.53	11.78	2.56	1.66	-1.25	0.002995	0.0508	Unaltered group
A1CF	10q11.23	4.76	6.3	3.15	2.31	-1.54	0.002996	0.0508	Unaltered group
MYO3B	2q31.1	4.28	3.19	2.22	2.02	1.1	0.003016	0.051	Altered group
DNAH11	7p15.3	6.69	8.39	3.46	2.72	-1.7	0.00302	0.0511	Unaltered group
TREH	11q23.3	2.63	3.92	2.61	2.44	-1.29	0.003032	0.0511	Unaltered group
SMIM32	5q31.1	4.62	6.18	3.17	2.69	-1.56	0.003059	0.0511	Unaltered group
LRP2	2q31.1	10.38	12.58	4.54	2.57	-2.2	0.003092	0.0514	Unaltered group
SLC9A2	2q12.1	4.14	2.56	3.26	2.25	1.59	0.003104	0.0515	Altered group
TNFSF9	19p13.3	6.13	7.22	2.25	1.42	-1.09	0.003156	0.0522	Unaltered group
SERPINF2	17p13.3	10.31	11.52	2.49	1.76	-1.21	0.003156	0.0522	Unaltered group
UPB1	22q11.23	7.09	8.66	3.23	1.99	-1.56	0.003194	0.0526	Unaltered group
SIX4	14q23.1	3.95	2.78	2.41	1.57	1.16	0.003219	0.0527	Altered group
NLRP6	11p15.5	4.39	5.51	2.31	1.81	-1.12	0.003228	0.0527	Unaltered group
GYG2	Xp22.33	4.72	3.37	2.77	2.28	1.35	0.003248	0.0528	Altered group
NPR3	5p13.3	9.73	10.84	2.29	1.93	-1.11	0.003254	0.0528	Unaltered group
NAT8	2p13.1	9.66	11.48	3.77	2.69	-1.82	0.003333	0.0534	Unaltered group
PTGES	9q34.11	7.26	6.13	2.35	1.88	1.14	0.003382	0.0536	Altered group
CLEC18B	16q23.1	8.29	9.78	3.11	2.07	-1.49	0.003413	0.0539	Unaltered group
PNMA3	Xq28	5.33	6.44	2.29	2	-1.11	0.003449	0.0543	Unaltered group
IRX3	16q12.2	8.84	10.01	2.47	1.33	-1.17	0.003546	0.0552	Unaltered group
KHK	2p23.3	10.08	11.23	2.41	1.63	-1.15	0.003588	0.0553	Unaltered group
SLC47A1	17p11.2	9.96	11.59	3.43	2.07	-1.63	0.003624	0.0553	Unaltered group
LINC01622	6p25.3	4.18	5.55	2.85	2.4	-1.37	0.003693	0.0556	Unaltered group
FUT6	19p13.3	6.39	7.92	3.22	2.2	-1.53	0.003703	0.0557	Unaltered group
CLEC18A	16q22.1	8.98	10.27	2.71	1.97	-1.29	0.003787	0.0565	Unaltered group
ANPEP	15q26.1	11.44	12.73	2.72	1.53	-1.29	0.003801	0.0566	Unaltered group
TMEM82	1p36.21	3.71	5.04	2.77	2.49	-1.33	0.003873	0.0571	Unaltered group
CSDC2	22q13.2	4.47	5.92	3.02	2.86	-1.45	0.003906	0.0575	Unaltered group
GGTLC2	22q11.22	7.28	8.57	2.75	1.61	-1.29	0.003927	0.0576	Unaltered group
LAMC3	9q34.12	7.13	8.22	2.29	1.9	-1.09	0.003936	0.0576	Unaltered group
MYO3A	10p12.1	5.97	7.35	2.94	1.69	-1.38	0.003961	0.0576	Unaltered group
FGFR3	4p16.3	7.81	8.89	2.31	1.4	-1.08	0.004057	0.0586	Unaltered group
PGAP4	9q31.1	7.51	8.52	2.15	1.27	-1.01	0.004061	0.0586	Unaltered group
ANGPTL4	19p13.2	12.12	13.67	3.34	1.67	-1.56	0.004186	0.0597	Unaltered group
LRRC75B	22q11.23	8.08	9.11	2.2	1.16	-1.02	0.004203	0.0597	Unaltered group
RADX	Xq22.3	6.22	7.33	2.36	1.37	-1.1	0.00423	0.0599	Unaltered group
SLC28A1	15q25.3	9.17	10.95	3.85	1.89	-1.79	0.004238	0.0599	Unaltered group
ACE2	Xp22.2	7.89	9.58	3.6	2.84	-1.69	0.004306	0.0603	Unaltered group
LGI4	19q13.12	8.09	9.42	2.85	2.27	-1.33	0.004453	0.0616	Unaltered group
BHMT	5q14.1	10.21	11.78	3.38	2.07	-1.57	0.004471	0.0616	Unaltered group
SLC22A2	6q25.3	9.31	11.27	4.2	2.69	-1.95	0.004486	0.0617	Unaltered group
TRNP1	1p36.11	6.38	5.37	2.17	1.82	1.01	0.00454	0.062	Altered group
SLC16A9	10q21.2	8.54	9.94	3.02	2.07	-1.4	0.004575	0.0622	Unaltered group
LIME1	20q13.33	7.83	8.93	2.37	1.67	-1.1	0.004613	0.0624	Unaltered group
ANG	14q11.2	8.12	9.16	2.26	1.11	-1.04	0.004639	0.0625	Unaltered group
GGT3P	22q11.21	6.4	7.56	2.51	1.59	-1.16	0.0047	0.0626	Unaltered group
FREM2	13q13.3	6.95	8.31	2.93	2.1	-1.36	0.004715	0.0626	Unaltered group
DNER	2q36.3	5.2	3.81	2.98	2.55	1.39	0.00474	0.0628	Altered group
NGEF	2q37.1	6.01	7.23	2.66	1.79	-1.23	0.004763	0.0629	Unaltered group
GPR143	Xp22.2	6.66	5.4	2.69	2.34	1.25	0.004763	0.0629	Altered group
CGREF1	2p23.3	7.62	8.94	2.87	1.63	-1.32	0.004782	0.063	Unaltered group
FTCD	21q22.3	5.36	6.97	3.44	3.12	-1.6	0.004887	0.0635	Unaltered group
CDHR2	5q35.2	5.74	7.29	3.36	2.86	-1.56	0.004967	0.0639	Unaltered group
AGTR1	3q24	6.3	7.33	2.22	2.01	-1.03	0.005074	0.0645	Unaltered group
SERPINA6	14q32.13	6.22	7.68	3.18	2.32	-1.46	0.005125	0.0648	Unaltered group
COCH	14q12	4.8	3.64	2.55	1.89	1.17	0.005207	0.0652	Altered group
SMTNL2	17p13.2	6.77	7.88	2.43	1.65	-1.11	0.005313	0.0659	Unaltered group
SLC7A9	19q13.11	6.33	7.79	3.2	1.98	-1.45	0.005318	0.0659	Unaltered group
GBA3	4p15.2	8.26	9.77	3.31	2.32	-1.51	0.005368	0.0662	Unaltered group
LY6E	8q24.3	11.19	12.2	2.23	1.24	-1.01	0.00547	0.0665	Unaltered group
NDUFA4L2	12q13.3	13.04	14.43	3.09	1.82	-1.39	0.005592	0.0673	Unaltered group
HHLA2	3q13.13	7.93	9.64	3.81	2.47	-1.72	0.005719	0.0682	Unaltered group
VWCE	11q12.2	5.99	7.14	2.54	2	-1.15	0.005848	0.0689	Unaltered group
ENPP3	6q23.2	10.08	11.96	4.2	2.24	-1.88	0.005851	0.0689	Unaltered group
SLC38A4	12q13.11	5.42	4.01	3.11	2.51	1.4	0.006048	0.0699	Altered group
PRODH2	19q13.12	6.19	7.59	3.12	2.33	-1.4	0.006067	0.07	Unaltered group
KBTBD11	8p23.3	9.97	10.97	2.26	1.11	-1	0.006251	0.0708	Unaltered group
PPP1R1A	12q13.2	7.22	5.56	3.65	3.72	1.66	0.006261	0.0708	Altered group
GPT	8q24.3	6.53	7.56	2.29	1.86	-1.03	0.006265	0.0708	Unaltered group
STK33	11p15.4	5.62	4.53	2.4	2.54	1.09	0.006374	0.0714	Altered group
MYH8	17p13.1	1.63	2.8	2.51	3.3	-1.17	0.006391	0.0715	Unaltered group
ASPA	17p13.2	7.17	8.29	2.54	1.53	-1.12	0.00648	0.0721	Unaltered group
CLEC18C	16q22.1	6.9	8.36	3.29	2.36	-1.46	0.006556	0.0727	Unaltered group
TRHDE-AS1	12q21.1	4.39	5.68	2.89	2.28	-1.29	0.006576	0.0727	Unaltered group
RASAL1	12q24.13	6.74	8.02	2.91	1.71	-1.28	0.006681	0.0733	Unaltered group
PLPP4	10q26.12	3.75	2.66	2.46	1.66	1.09	0.006712	0.0735	Altered group
SPTBN2	11q13.2	6.74	5.33	3.16	2.55	1.41	0.006777	0.0739	Altered group
MAPK15	8q24.3	5.28	6.44	2.63	1.89	-1.16	0.006849	0.0744	Unaltered group
CPEB1	15q25.2	3.3	2.29	2.26	2.06	1.01	0.006934	0.0748	Altered group
PKLR	1q22	6.41	7.91	3.4	2.42	-1.5	0.006936	0.0748	Unaltered group
PDZD3	11q23.3	5.4	6.66	2.86	1.92	-1.26	0.006977	0.075	Unaltered group
TGFA	2p13.3	10.33	11.4	2.45	1.33	-1.07	0.007068	0.0754	Unaltered group
GGT8P	2p11.2	4.35	5.37	2.34	1.67	-1.03	0.007079	0.0754	Unaltered group
ACSM2A	16p12.3	9.23	11.07	4.21	2.51	-1.84	0.007084	0.0754	Unaltered group
ABCC3	17q21.33	10.48	11.65	2.7	1.22	-1.17	0.007292	0.0769	Unaltered group
MGARP	4q31.1	4.84	5.97	2.55	2.35	-1.12	0.007577	0.0779	Unaltered group
REG1A	2p12	5.59	7.54	4.47	3.49	-1.95	0.007615	0.078	Unaltered group
PKHD1	6p12.3-p12.2	8.25	9.63	3.19	2.06	-1.38	0.007751	0.0788	Unaltered group
CLDN2	Xq22.3	10.16	11.72	3.61	2.2	-1.56	0.007834	0.0792	Unaltered group
ASPHD1	16p11.2	6.28	7.33	2.43	1.36	-1.05	0.007878	0.0793	Unaltered group
MYL3	3p21.31	3.95	5.1	2.65	2.21	-1.15	0.007923	0.0795	Unaltered group
GGT1	22q11.23	10.06	11.38	3.09	1.53	-1.31	0.008383	0.0815	Unaltered group
CCL15-CCL14	17q12	4.88	6.26	3.22	2.02	-1.38	0.008437	0.0818	Unaltered group
PLG	6q26	2.77	4.43	3.82	3.97	-1.67	0.008617	0.083	Unaltered group
CYP11A1	15q24.1	3.28	1.9	3.23	2.31	1.38	0.008716	0.0837	Altered group
ISM2	14q24.3	3.18	2.18	2.32	1.97	1	0.008732	0.0838	Altered group
FUT3	19p13.3	3.39	4.39	2.36	1.84	-1.01	0.008792	0.084	Unaltered group
GZMK	5q11.2	7.07	8.06	2.33	1.86	-1	0.008888	0.0846	Unaltered group
TMPRSS2	21q22.3	5.36	3.78	3.73	2.42	1.58	0.009052	0.0855	Altered group
ERICH5	8q22.2	5.69	6.81	2.63	2.01	-1.11	0.009294	0.0867	Unaltered group
CYP2J2	1p32.1	8.9	10.59	4.02	2.38	-1.69	0.009354	0.0869	Unaltered group
AGMO	7p21.2	5.62	6.92	3.07	2.19	-1.3	0.009384	0.087	Unaltered group
USH1C	11p15.1	9.48	11.09	3.86	1.91	-1.61	0.009504	0.0876	Unaltered group
BBOX1	11p14.2	9.41	10.91	3.6	2.28	-1.51	0.009748	0.0886	Unaltered group
TMEM61	1p32.3	3.18	1.89	3.1	2.01	1.3	0.00991	0.0895	Altered group
COLEC12	18p11.32	6.89	5.89	2.37	1.89	1	0.009915	0.0895	Altered group
PTH1R	3p21.31	6.97	8	2.48	1.63	-1.04	0.009938	0.0896	Unaltered group
ANKS4B	16p12.2	6.19	7.45	3.01	2.08	-1.26	0.0101	0.0902	Unaltered group
ACSM2B	16p12.3	8.69	10.44	4.2	2.61	-1.74	0.0103	0.0915	Unaltered group
TRHDE	12q21.1	6.23	7.56	3.17	2.34	-1.32	0.0104	0.092	Unaltered group
EGLN3	14q13.1	12.12	13.26	2.76	1.4	-1.14	0.0105	0.0925	Unaltered group
KCNJ3	2q24.1	6.13	7.29	2.8	1.8	-1.16	0.0107	0.093	Unaltered group
LINC01018	5p15.31	3.54	2.49	2.54	1.91	1.06	0.0107	0.093	Altered group
CLDN10	13q32.1	7.57	8.82	3.04	1.53	-1.25	0.0108	0.0933	Unaltered group
QRFPR	4q27	6.61	7.88	3.08	1.91	-1.27	0.0109	0.0941	Unaltered group
HNF4A	20q13.12	8.03	9.5	3.59	2.19	-1.47	0.0112	0.0948	Unaltered group
CA9	9p13.3	10.21	12	4.38	2.15	-1.79	0.0112	0.0948	Unaltered group
PKIA	8q21.13	6.68	5.66	2.48	1.79	1.02	0.0112	0.0948	Altered group
B4GALNT3	12p13.33	5.71	4.71	2.44	1.6	1	0.0113	0.0951	Altered group
PIK3C2G	12p12.3	1.86	0.61	3.07	1.26	1.24	0.0115	0.096	Altered group
SEZ6L2	16p11.2	9.3	10.33	2.54	1.32	-1.03	0.0115	0.096	Unaltered group
GAL3ST1	22q12.2	10.15	11.2	2.57	1.54	-1.05	0.0116	0.0965	Unaltered group
PGA3	11q12.2	3.17	4.19	2.44	2.42	-1.02	0.0118	0.0975	Unaltered group
CUBN	10p13	10.93	12.32	3.42	2.16	-1.39	0.0121	0.0988	Unaltered group
CD70	19p13.3	7.44	8.88	3.55	2.47	-1.44	0.0121	0.0991	Unaltered group
STK32A	5q32	3.46	2.35	2.73	1.96	1.11	0.0122	0.0991	Altered group
GLYAT	11q12.1	8.11	9.55	3.56	2.36	-1.45	0.0122	0.0994	Unaltered group
ESRP1	8q22.1	4.31	2.89	3.49	2.68	1.42	0.0124	0.1	Altered group
FCAMR	1q32.1	5.25	6.48	3.02	2.36	-1.23	0.0126	0.101	Unaltered group
PDZK1	1q21.1	10.42	11.42	2.51	1.5	-1	0.0136	0.105	Unaltered group
CXCL14	5q31.1	11.35	12.7	3.41	1.97	-1.35	0.0137	0.106	Unaltered group
FOLR1	11q13.4	8.8	9.8	2.51	1.64	-1	0.0137	0.106	Unaltered group
CYS1	2p25.1	9.28	10.29	2.55	1.76	-1.01	0.0142	0.108	Unaltered group
PDZK1P1	1q21.2	6.5	7.67	2.94	2.11	-1.17	0.0142	0.108	Unaltered group
SYT10	12p11.1	2.08	0.93	2.94	1.67	1.16	0.0145	0.109	Altered group
GJB1	Xq13.1	6.9	7.9	2.54	1.7	-1	0.0145	0.109	Unaltered group
RHCG	15q26.1	4.05	2.07	5.04	2.85	1.98	0.0146	0.109	Altered group
RHBG	1q22	2.84	1.24	4.06	2.1	1.59	0.0146	0.109	Altered group
GALNT17	7q11.22	4.42	2.97	3.67	2.63	1.45	0.0147	0.109	Altered group
PNMA2	8p21.2	9.46	10.56	2.83	1.43	-1.11	0.0149	0.11	Unaltered group
PPP1R1B	17q12	2.46	1.4	2.68	1.64	1.05	0.015	0.111	Altered group
BAIAP2L2	22q13.1	7.29	8.3	2.56	1.72	-1.01	0.0151	0.111	Unaltered group
SLC13A1	7q31.32	5.68	7.28	4.05	3.26	-1.6	0.0152	0.111	Unaltered group
SMOC1	14q24.1	5.26	3.86	3.56	2.44	1.39	0.0154	0.113	Altered group
XDH	2p23.1	3.06	1.91	2.93	2.16	1.15	0.0156	0.113	Altered group
ENPP7	17q25.3	3.23	4.39	2.93	2.6	-1.16	0.0156	0.113	Unaltered group
TNFAIP6	2q23.3	7.98	9.24	3.25	2.03	-1.26	0.016	0.114	Unaltered group
SLC17A1	6p22.2	6.45	7.83	3.55	2.46	-1.38	0.0162	0.115	Unaltered group
PDZK1IP1	1p33	11.29	12.56	3.28	1.61	-1.26	0.0162	0.115	Unaltered group
CLCNKB	1p36.13	5.32	3.7	4.18	2.65	1.62	0.0164	0.116	Altered group
MARCHF10	17q23.2	2.38	1.35	2.66	1.46	1.03	0.0165	0.117	Altered group
CNTN3	3p12.3	3.96	2.71	3.22	2.33	1.25	0.0165	0.117	Altered group
SH3GL2	9p22.2	3.82	2.7	2.86	2.49	1.12	0.0166	0.117	Altered group
GALNT14	2p23.1	10.84	12.01	3.04	1.28	-1.16	0.0168	0.118	Unaltered group
UBD	6p22.1	9.73	10.79	2.74	1.78	-1.05	0.0169	0.118	Unaltered group
AOX1	2q33.1	8.56	9.66	2.84	2.06	-1.1	0.017	0.118	Unaltered group
NTNG1	1p13.3	2.69	1.67	2.65	1.81	1.02	0.0171	0.118	Altered group
ALDOB	9q31.1	7.34	8.76	3.65	3.19	-1.42	0.0172	0.119	Unaltered group
PCK1	20q13.31	8.6	9.79	3.05	2.75	-1.19	0.0174	0.119	Unaltered group
MYEOV	11q13.3	5.26	6.57	3.36	3.11	-1.31	0.0174	0.119	Unaltered group
RNF186	1p36.13	6.68	7.85	3.04	2.29	-1.17	0.0176	0.12	Unaltered group
SERPINA1	14q32.13	13.37	14.4	2.71	1.67	-1.03	0.018	0.121	Unaltered group
SLC38A3	3p21.31	2.81	1.7	2.93	1.73	1.11	0.0183	0.122	Altered group
DNAJB13	11q13.4	3.94	5.03	2.81	2.69	-1.09	0.0183	0.122	Unaltered group
GLYATL1	11q12.1	8.33	9.53	3.18	2.07	-1.21	0.0185	0.123	Unaltered group
THRSP	11q14.1	3.12	1.94	3.11	2.03	1.18	0.0188	0.124	Altered group
KLK4	19q13.41	2.53	1.14	3.66	2.16	1.38	0.0189	0.125	Altered group
AGT	1q42.2	9.62	10.67	2.8	1.58	-1.05	0.0191	0.125	Unaltered group
EPN3	17q21.33	3.3	2.1	3.18	2	1.2	0.0192	0.126	Altered group
PKP3	11p15.5	4.56	3.4	3.04	2.56	1.15	0.0198	0.128	Altered group
AGXT2	5p13.2	7.79	9.22	3.79	2.52	-1.42	0.0199	0.128	Unaltered group
ARX	Xp21.3	2.66	1.62	2.74	2.25	1.03	0.02	0.128	Altered group
CD177	19q13.31	3.49	2.46	2.78	1.72	1.04	0.0201	0.129	Altered group
CREB3L3	19p13.3	6.2	7.64	3.88	2.56	-1.44	0.021	0.132	Unaltered group
ASPDH	19q13.33	3.34	4.34	2.67	2.23	-1	0.0211	0.132	Unaltered group
FGF9	13q12.11	3.35	2.04	3.53	2.25	1.31	0.0212	0.132	Altered group
GABRB3	15q12	6.35	7.43	2.9	2.14	-1.08	0.0213	0.133	Unaltered group
LHX9	1q31.3	1.66	0.48	3.23	1.29	1.18	0.0215	0.133	Altered group
TINAG	6p12.1	7.34	8.48	3.07	2.24	-1.14	0.0216	0.133	Unaltered group
PRUNE2	9q21.2	10.83	11.95	3.08	1.5	-1.13	0.0218	0.134	Unaltered group
SLC2A5	1p36.23	9.35	10.48	3.09	1.83	-1.14	0.0219	0.134	Unaltered group
CLRN3	10q26.2	7.96	9.26	3.55	2.1	-1.3	0.0221	0.135	Unaltered group
BSND	1p32.3	2.14	0.74	3.84	1.86	1.4	0.0222	0.136	Altered group
SPON1	11p15.2	7.85	9.08	3.31	2.84	-1.23	0.0226	0.137	Unaltered group
STAP1	4q13.2	4.14	2.87	3.48	1.94	1.27	0.0227	0.137	Altered group
C1QL4	12q13.12	4.51	5.57	2.84	2.64	-1.05	0.0229	0.138	Unaltered group
HEPACAM2	7q21.2	2.76	1.13	4.53	2.12	1.63	0.0243	0.142	Altered group
TJP3	19p13.3	4.19	3.12	2.94	2.11	1.06	0.0248	0.144	Altered group
FABP7	6q22.31	7.67	9.48	5	3.93	-1.81	0.025	0.145	Unaltered group
ATP6V0D2	8q21.3	5.21	3.62	4.44	2.78	1.59	0.0251	0.145	Altered group
FA2H	16q23.1	5.01	3.99	2.86	1.91	1.03	0.0254	0.146	Altered group
SLC26A7	8q21.3	5.24	3.92	3.72	2.07	1.33	0.0255	0.146	Altered group
TFCP2L1	2q14.2	7.8	6.67	3.15	2.26	1.13	0.0255	0.146	Altered group
SLC17A3	6p22.2	9.24	10.78	4.29	2.99	-1.54	0.026	0.147	Unaltered group
PLA2G4F	15q15.1	2.79	1.42	3.88	2.19	1.37	0.0266	0.149	Altered group
INPP5J	22q12.2	5.87	4.7	3.33	1.63	1.17	0.0275	0.151	Altered group
IGF2BP1	17q21.32	4.73	5.74	2.83	2.37	-1.01	0.0275	0.151	Unaltered group
NPY6R	5q31.2	6.37	7.37	2.85	2.05	-1.01	0.0283	0.153	Unaltered group
ACMSD	2q21.3	8.24	9.45	3.46	1.98	-1.21	0.0284	0.154	Unaltered group
DIRAS1	19p13.3	4.17	3.17	2.85	1.8	1	0.0288	0.155	Altered group
SLN	11q22.3	3.01	2.01	2.83	2.25	1	0.0288	0.155	Altered group
SLC10A2	13q33.1	5.81	7.06	3.54	2.97	-1.25	0.0296	0.157	Unaltered group
CPA4	7q32.2	4.83	3.58	3.58	2.58	1.25	0.03	0.158	Altered group
C19ORF33	19q13.2	7.68	8.75	3.09	1.9	-1.06	0.0312	0.162	Unaltered group
SLC4A9	5q31.3	2.07	1.04	3	1.65	1.03	0.0312	0.162	Altered group
NR0B2	1p36.11	2.09	0.94	3.38	1.87	1.15	0.0335	0.168	Altered group
UGT2A3	4q13.2	9.4	10.7	3.84	2.39	-1.31	0.0337	0.169	Unaltered group
DIRAS2	9q22.2	7.78	8.83	3.11	1.66	-1.05	0.0338	0.169	Unaltered group
TTR	18q12.1	2.6	1.3	3.85	2.08	1.3	0.0339	0.17	Altered group
SLC34A1	5q35.3	2.82	3.84	2.95	2.79	-1.01	0.0351	0.172	Unaltered group
PART1	5q12.1	2.23	1.02	3.6	1.87	1.21	0.0353	0.173	Altered group
FOXI1	5q35.1	2.87	1.34	4.56	2.54	1.53	0.0356	0.174	Altered group
EPHA7	6q16.1	7.99	9.19	3.58	2.22	-1.2	0.036	0.175	Unaltered group
KCNJ16	17q24.3	10.37	11.54	3.53	1.46	-1.17	0.036	0.175	Unaltered group
UGT3A1	5p13.2	6.23	7.58	3.98	3.49	-1.35	0.036	0.175	Unaltered group
CALCA	11p15.2	1.65	0.56	3.27	1.48	1.09	0.0361	0.175	Altered group
CLDN8	21q22.11	2.9	1.37	4.63	2.31	1.53	0.0374	0.178	Altered group
GCGR	17q25.3	2.11	1.01	3.29	2	1.09	0.0378	0.179	Altered group
CLNK	4p16.1	2.39	1.33	3.22	1.69	1.06	0.0386	0.18	Altered group
ATP6V1G3	1q31.3	2	0.69	4.03	1.98	1.32	0.04	0.183	Altered group
TEX11	Xp11	4.11	5.15	3.13	2.66	-1.04	0.0403	0.184	Unaltered group
TRIM50	7q11.23	3.11	2.03	3.34	1.68	1.08	0.0421	0.188	Altered group
PAPPA2	1q25.2	4.16	3.09	3.29	2.31	1.07	0.0422	0.189	Altered group
ANXA13	8q24.13	6.41	7.57	3.56	2.61	-1.15	0.0437	0.192	Unaltered group
AQP6	12q13.12	3.39	2.22	3.64	2.33	1.17	0.044	0.193	Altered group
DMRT2	9p24.3	2.86	1.57	4	2.3	1.28	0.0444	0.194	Altered group
CDHR1	10q23.1	6.28	7.31	3.16	2.68	-1.02	0.0447	0.195	Unaltered group
FAM83F	22q13.1	4.31	3.31	3.08	2.77	1	0.0449	0.195	Altered group
CYP2C9	10q23.33	4.09	3.05	3.23	2.19	1.03	0.0451	0.195	Altered group
KLK15	19q13.33	1.4	0.36	3.28	1.52	1.03	0.0467	0.199	Altered group
FMO1	1q24.3	8.46	9.56	3.52	2.24	-1.11	0.0491	0.204	Unaltered group
FBN3	19p13.2	1.9	0.8	3.55	1.73	1.1	0.0505	0.208	Altered group
DPYS	8q22.3	8.32	9.39	3.46	2.2	-1.07	0.0527	0.213	Unaltered group
ATP6V0A4	7q34	4	2.47	4.97	3.02	1.53	0.0532	0.214	Altered group
CFTR	7q31.2	2.92	1.62	4.35	2.52	1.3	0.0592	0.226	Altered group
CHRDL1	Xq23	5.33	4.25	3.56	3.05	1.08	0.0605	0.229	Altered group
GSTA2	6p12.2	8.66	9.89	4.17	2.92	-1.23	0.0645	0.237	Unaltered group
LINC01139	1q43	5.73	6.76	3.55	3.16	-1.03	0.0709	0.249	Unaltered group
PRAP1	10q26.3	6.3	7.41	3.89	2.77	-1.11	0.0729	0.253	Unaltered group
HAVCR1	5q33.3	7.63	8.71	3.78	2.33	-1.07	0.0741	0.255	Unaltered group
KLK1	19q13.33	2.68	1.51	4.19	2.52	1.18	0.076	0.259	Altered group
UGT1A9	2q37.1	9.49	10.62	4.04	2.6	-1.12	0.0807	0.268	Unaltered group
F2	11p11.2	4.17	3.15	3.67	3.08	1.03	0.0808	0.268	Altered group
EPO	7q22.1	3.31	4.31	3.62	3.37	-1.01	0.0841	0.274	Unaltered group
TMEM213	7q34	3.83	2.51	4.84	2.83	1.32	0.0858	0.277	Altered group
CKMT1B	15q15.3	4.14	3.11	3.83	2.69	1.03	0.0903	0.284	Altered group
CKMT1A	15q15.3	3.11	2.09	3.82	2.52	1.03	0.0906	0.285	Altered group
GSTA1	6p12.2	10.24	11.39	4.31	2.7	-1.15	0.0914	0.286	Unaltered group
ALPI	2q37.1	3.85	4.86	3.8	3.29	-1.01	0.097	0.296	Unaltered group
SAA1	11p15.1	5.95	4.92	4.13	4.07	1.03	0.124	0.338	Altered group
